# Supplementary material for: Comparison of Salt Stress Tolerance among Two Leaf and Six Grain Cultivars of Amaranthus cruentus L
Source: MDPI journal article supplement (doi:10.3390/plants12183310), 2023-09-19
Supplement: s1 [file s1]

**Table S1.** Origin and main morphological characteristics of the eight *A. cruentus* cultivars used in this study.

| Cultivar type | Cultivar name        | Country   | Accession* | Red pigmentation | Leafy ramifications | Inflorescence color | Seed color | Starch type | 1000 seeds weight (mg) |
|---------------|----------------------|-----------|------------|------------------|---------------------|---------------------|------------|-------------|------------------------|
| Leafy         | Locale               | Benin     | /          | No               | Yes                 | Green-Yellow        | Black      | Non-waxy    | 390 ± 6.36             |
| Leafy         | Rouge                | Benin     | /          | Yes              | Yes                 | Red                 | Black      | Non-waxy    | 331 ± 26.9             |
| Grain         | Alegria Disciplinada | Mexico    | 01Z5200138 | Yes              | No                  | ND*                 | White      | Waxy        | 761 ± 123              |
| Grain         | Don Armando          | USA       | 01Z5200035 | Yes              | No                  | Reddish yellow      | White      | Waxy        | 749 ± 36.5             |
| Grain         | Don Leon             | Argentina | 01Z5200166 | No               | No                  | Green-Yellow        | White      | Waxy        | 802 ± 91.8             |
| Grain         | K91                  | Venezuela | 01Z5200094 | Yes              | Yes                 | Red                 | White      | Non-waxy    | 608 ± 24.6             |
| Grain         | Montana 5            | USA       | 01Z5200032 | Yes              | No                  | Green and red       | White      | Waxy        | 521 ± 164              |
| Grain         | Red Amaranth         | China     | 01Z5200162 | Yes              | No                  | Reddish yellow      | White      | Waxy        | 645 ± 92.9             |

\* in the Genebank of the Crop Research Institute (CRI, Prague, Czech Republic). ND : no data.

**Table S2.** Anova results of biomass production.

| variable             | term      | df | sumsq  | meansq | statistic | p.value | signif |
|----------------------|-----------|----|--------|--------|-----------|---------|--------|
| Leaf dry weight      | var       | 7  | 2,4    | 0,3    | 2,5482    | 0,0189  | *      |
|                      | trt       | 2  | 20,5   | 10,3   | 75,9123   | < 0,001 | ***    |
|                      | var:trt   | 14 | 4,1    | 0,3    | 2,1492    | 0,0154  | *      |
|                      | Residuals | 96 | 13,0   | 0,1    |           |         |        |
| Leaf fresh weight    | var       | 7  | 147,0  | 21,0   | 2,6072    | 0,0166  | *      |
|                      | trt       | 2  | 1858,9 | 929,5  | 115,3931  | < 0,001 | ***    |
|                      | var:trt   | 14 | 217,2  | 15,5   | 1,9259    | 0,0327  | *      |
|                      | Residuals | 96 | 773,3  | 8,1    |           |         |        |
| Leaves water content | var       | 7  | 0,0    | 0,0    | 1,0713    | 0,3879  | ns     |
|                      | trt       | 2  | 0,1    | 0,1    | 9,3639    | 0,0002  | ***    |
|                      | var:trt   | 14 | 0,1    | 0,0    | 0,8746    | 0,5880  | ns     |
|                      | Residuals | 96 | 0,6    | 0,0    |           |         |        |
| Root dry weight      | var       | 7  | 0,4    | 0,1    | 3,1709    | 0,0046  | ***    |
|                      | trt       | 2  | 0,7    | 0,4    | 20,9021   | < 0,001 | ***    |
|                      | var:trt   | 14 | 0,2    | 0,0    | 0,7727    | 0,6956  | ns     |
|                      | Residuals | 96 | 1,6    | 0,0    |           |         |        |
| Root fresh weight    | var       | 7  | 223,5  | 31,9   | 5,9796    | < 0,001 | ***    |
|                      | trt       | 2  | 617,4  | 308,7  | 57,8058   | < 0,001 | ***    |
|                      | var:trt   | 14 | 65,9   | 4,7    | 0,8817    | 0,5805  | ns     |
|                      | Residuals | 96 | 512,7  | 5,3    |           |         |        |
| Root water content   | var       | 7  | 0,0    | 0,0    | 1,0395    | 0,4089  | ns     |
|                      | trt       | 2  | 0,0    | 0,0    | 3,1061    | 0,0493  | *      |
|                      | var:trt   | 14 | 0,0    | 0,0    | 1,3725    | 0,1816  | ns     |
|                      | Residuals | 96 | 0,1    | 0,0    |           |         |        |
| Stem dry weight      | var       | 7  | 2,0    | 0,3    | 6,4061    | < 0,001 | ***    |
|                      | trt       | 2  | 2,2    | 1,1    | 24,5931   | < 0,001 | ***    |
|                      | var:trt   | 14 | 0,8    | 0,1    | 1,2128    | 0,2792  | ns     |
|                      | Residuals | 95 | 4,2    | 0,0    |           |         |        |
| Stem fresh weight    | var       | 7  | 321,6  | 45,9   | 8,7797    | < 0,001 | ***    |
|                      | trt       | 2  | 959,0  | 479,5  | 91,6353   | < 0,001 | ***    |
|                      | var:trt   | 14 | 72,6   | 5,2    | 0,9910    | 0,4685  | ns     |
|                      | Residuals | 96 | 502,4  | 5,2    |           |         |        |
| Stem water content   | var       | 7  | 0,0    | 0,0    | 1,9093    | 0,0764  | ns     |
|                      | trt       | 2  | 0,0    | 0,0    | 5,8681    | 0,0040  | ***    |
|                      | var:trt   | 14 | 0,0    | 0,0    | 1,2906    | 0,2277  | ns     |
|                      | Residuals | 95 | 0,0    | 0,0    |           |         |        |
| Total dry weight     | var       | 7  | 9,7    | 1,4    | 3,3988    | 0,0028  | ***    |
|                      | trt       | 2  | 45,4   | 22,7   | 55,6513   | < 0,001 | ***    |
|                      | var:trt   | 14 | 9,9    | 0,7    | 1,7387    | 0,0604  | ns     |
|                      | Residuals | 95 | 38,8   | 0,4    |           |         |        |

**Table S3.** Water content of leaves, stem and roots of eight cultivars of *A. cruentus* exposed to 0 mM, 50 mM and 100 mM of NaCl. Treatments followed by different letters for the same cultivar are significantly different ( $\alpha = 0.05$ ).

| Cultivar      | 0 mM                 | 50 mM          | 100 mM        | 0 mM               | 50 mM          | 100 mM        |
|---------------|----------------------|----------------|---------------|--------------------|----------------|---------------|
|               | Leaves water content |                |               | Stem water content |                |               |
| Locale        | 0.89 ± 0.01 a        | 0.87 ± 0.01 a  | 0.83 ± 0.03 b | 0.95 ± 0.00 a      | 0.95 ± 0.01 a  | 0.95 ± 0.01 a |
| Rouge         | 0.88 ± 0.01 a        | 0.86 ± 0.03 ab | 0.84 ± 0.00 b | 0.95 ± 0.01 a      | 0.95 ± 0.01 a  | 0.94 ± 0.01 a |
| Montana 5     | 0.88 ± 0.02 a        | 0.88 ± 0.04 a  | 0.77 ± 0.22 a | 0.94 ± 0.01 a      | 0.95 ± 0.01 a  | 0.94 ± 0.01 a |
| Don Leon      | 0.89 ± 0.02 a        | 0.88 ± 0.01 a  | 0.73 ± 0.29 a | 0.95 ± 0.02 a      | 0.95 ± 0.01 a  | 0.94 ± 0.02 a |
| K91           | 0.89 ± 0.00 a        | 0.89 ± 0.02 a  | 0.87 ± 0.02 a | 0.96 ± 0.01 a      | 0.96 ± 0.01 ab | 0.95 ± 0.00 b |
| Alegria Disc. | 0.87 ± 0.02 a        | 0.88 ± 0.01 a  | 0.73 ± 0.13 b | 0.93 ± 0.02 a      | 0.94 ± 0.01 a  | 0.95 ± 0.02 a |
| Don Armando   | 0.88 ± 0.01 a        | 0.89 ± 0.01 a  | 0.86 ± 0.02 b | 0.95 ± 0.0065 ab   | 0.95 ± 0.01 a  | 0.93 ± 0.01 b |
|               | Roots water content  |                |               |                    |                |               |
| Locale        | 0.97 ± 0.01 a        | 0.97 ± 0.02 a  | 1.00 ± 0.05 a |                    |                |               |
| Rouge         | 0.967 ± 0.01 b       | 0.97 ± 0.01 b  | 1.00 ± 0.03 a |                    |                |               |
| Montana 5     | 0.97 ± 0.02 a        | 0.98 ± 0.02 a  | 0.97 ± 0.01 a |                    |                |               |
| Don Leon      | 0.97 ± 0.01 a        | 0.97 ± 0.01 a  | 1.03 ± 0.11 a |                    |                |               |
| K91           | 0.97 ± 0.01 a        | 0.97 ± 0.01 a  | 0.98 ± 0.02 a |                    |                |               |
| Alegria Disc. | 0.97 ± 0.01 a        | 0.97 ± 0.01 a  | 0.97 ± 0.02 a |                    |                |               |
| Don Armando   | 0.97 ± 0.02 a        | 0.97 ± 0.01 a  | 0.95 ± 0.02 a |                    |                |               |
| Red Amaranth  | 0.97 ± 0.01 a        | 0.98 ± 0.01 a  | 0.96 ± 0.02 a |                    |                |               |

**Table S4.** Anova results of mineral content.

|      |     | term      | df  | sumsq  | meansq | statistic | p.value | signif |
|------|-----|-----------|-----|--------|--------|-----------|---------|--------|
| Leaf | Ca  | var       | 7   | 1,1    | 0,2    | 0,32      | 0,9455  | ns     |
|      |     | trt       | 2   | 11,5   | 5,8    | 11,91     | < 0,001 | ***    |
|      |     | var:trt   | 14  | 4,9    | 0,4    | 0,73      | 0,7425  | ns     |
|      |     | Residuals | 120 | 58,0   | 0,5    |           |         |        |
|      | Fe  | var       | 7   | 202,8  | 29,0   | 0,40      | 0,9034  | ns     |
|      |     | trt       | 2   | 212,6  | 106,3  | 1,45      | 0,2383  | ns     |
|      |     | var:trt   | 14  | 1079,5 | 77,1   | 1,05      | 0,4072  | ns     |
|      |     | Residuals | 120 | 8787,8 | 73,2   |           |         |        |
|      | K   | var       | 7   | 8,3    | 1,2    | 0,14      | 0,9950  | ns     |
|      |     | trt       | 2   | 157,1  | 78,6   | 9,22      | < 0,001 | ***    |
|      |     | var:trt   | 14  | 5,7    | 0,4    | 0,05      | 1,0000  | ns     |
|      |     | Residuals | 120 | 1022,8 | 8,5    |           |         |        |
|      | Mg  | var       | 7   | 0,3    | 0,0    | 0,32      | 0,9442  | ns     |
|      |     | trt       | 2   | 4,9    | 2,5    | 17,26     | < 0,001 | ***    |
|      |     | var:trt   | 14  | 0,3    | 0,0    | 0,15      | 0,9998  | ns     |
|      |     | Residuals | 118 | 16,9   | 0,1    |           |         |        |
|      | Na  | var       | 7   | 25,0   | 3,6    | 0,77      | 0,6152  | ns     |
|      |     | trt       | 2   | 278,8  | 139,4  | 29,97     | < 0,001 | ***    |
|      |     | var:trt   | 14  | 31,5   | 2,2    | 0,48      | 0,9379  | ns     |
|      |     | Residuals | 118 | 548,8  | 4,7    |           |         |        |
|      | NaK | var       | 7   | 3,8    | 0,5    | 2,65      | 0,0141  | *      |
|      |     | trt       | 2   | 54,2   | 27,1   | 132,05    | < 0,001 | ***    |
|      |     | var:trt   | 14  | 5,4    | 0,4    | 1,87      | 0,0359  | *      |
|      |     | Residuals | 118 | 24,2   | 0,2    |           |         |        |
|      | Zn  | var       | 7   | 32,9   | 4,7    | 0,29      | 0,9578  | ns     |
|      |     | trt       | 2   | 4,7    | 2,3    | 0,14      | 0,8669  | ns     |
|      |     | var:trt   | 14  | 70,8   | 5,1    | 0,31      | 0,9919  | ns     |
|      |     | Residuals | 120 | 1960,4 | 16,3   |           |         |        |
| Stem | K   | var       | 7   | 29,8   | 4,3    | 0,53      | 0,8096  | ns     |
|      |     | trt       | 2   | 246,1  | 123,0  | 15,33     | < 0,001 | ***    |
|      |     | var:trt   | 14  | 66,4   | 4,7    | 0,59      | 0,8674  | ns     |
|      |     | Residuals | 119 | 955,0  | 8,0    |           |         |        |
|      | Na  | var       | 7   | 18,7   | 2,7    | 0,23      | 0,9764  | ns     |
|      |     | trt       | 2   | 354,5  | 177,3  | 15,50     | < 0,001 | ***    |
|      |     | var:trt   | 14  | 26,8   | 1,9    | 0,17      | 0,9997  | ns     |
|      |     | Residuals | 117 | 1338,0 | 11,4   |           |         |        |
|      | NaK | var       | 7   | 667,0  | 95,3   | 6,08      | < 0,001 | ***    |
|      |     | trt       | 2   | 386,8  | 193,4  | 12,35     | < 0,001 | ***    |
|      |     | var:trt   | 14  | 501,6  | 35,8   | 2,29      | < 0,001 | ***    |
|      |     | Residuals | 113 | 1770,1 | 15,7   |           |         |        |
| Root | K   | var       | 7   | 11,1   | 1,6    | 0,28      | 0,9596  | ns     |
|      |     | trt       | 2   | 125,3  | 62,6   | 11,15     | < 0,001 | ***    |

|  |     |           |     |       |      |        |         |     |
|--|-----|-----------|-----|-------|------|--------|---------|-----|
|  |     | var:trt   | 14  | 12,2  | 0,9  | 0,16   | 0,9998  | ns  |
|  |     | Residuals | 120 | 674,0 | 5,6  |        |         |     |
|  | Na  | var       | 7   | 5,9   | 0,8  | 0,30   | 0,9519  | ns  |
|  |     | trt       | 2   | 63,2  | 31,6 | 11,40  | < 0,001 | *** |
|  |     | var:trt   | 14  | 10,3  | 0,7  | 0,27   | 0,9963  | ns  |
|  |     | Residuals | 120 | 332,7 | 2,8  |        |         |     |
|  | NaK | var       | 7   | 1,8   | 0,3  | 1,31   | 0,2543  | ns  |
|  |     | trt       | 2   | 59,3  | 29,6 | 147,35 | < 0,001 | *** |
|  |     | var:trt   | 14  | 6,1   | 0,4  | 2,15   | 0,0138  | *   |
|  |     | Residuals | 113 | 22,7  | 0,2  |        |         |     |

**Table S5.** Anova results of photosynthetic activity.

| variable             | term      | df | sumsq   | meansq | statistic | p.value | signif |
|----------------------|-----------|----|---------|--------|-----------|---------|--------|
| Net photosynthesis   | var       | 7  | 8,825   | 1,261  | 0,6445    | 0,7181  | ns     |
|                      | trt       | 2  | 27,200  | 13,600 | 6,9518    | 0,0015  | ***    |
|                      | var:trt   | 14 | 15,067  | 1,076  | 0,5501    | 0,8964  | ns     |
|                      | Residuals | 96 | 187,805 | 1,956  |           |         |        |
| Stomatal conductance | var       | 7  | 0,233   | 0,033  | 9,1310    | < 0,001 | ***    |
|                      | trt       | 2  | 1,104   | 0,552  | 151,1021  | < 0,001 | ***    |
|                      | var:trt   | 14 | 0,262   | 0,019  | 5,1243    | < 0,001 | ***    |
|                      | Residuals | 96 | 0,351   | 0,004  |           |         |        |
| Transpiration rate   | var       | 7  | 12,559  | 1,794  | 7,9510    | < 0,001 | ***    |
|                      | trt       | 2  | 99,113  | 49,556 | 219,6132  | < 0,001 | ***    |
|                      | var:trt   | 14 | 11,088  | 0,792  | 3,5098    | < 0,001 | ***    |
|                      | Residuals | 96 | 21,663  | 0,226  |           |         |        |
| instWUE              | var       | 7  | 5.587   | 0.798  | 1.353     | 0.2353  | ns     |
|                      | trt       | 2  | 12.651  | 6.326  | 10.73     | < 0,001 | ***    |
|                      | var:trt   | 14 | 10.21   | 0.729  | 1.237     | 0.2643  | ns     |
|                      | Residuals | 88 | 51.90   | 0.590  |           |         |        |

**Table S6.** Foliar content of chlorophyll *b* of eight cultivars of *A. cruentus* exposed to 0 mM, 50 mM and 100 mM of NaCl. Treatments followed by different letters for the same cultivar are significantly different ( $\alpha = 0.05$ ).

| Cultivar      | 0 mM            | 50 mM            | 100 mM          |
|---------------|-----------------|------------------|-----------------|
| Locale        | 0.416 ± 0.077 a | 0.304 ± 0.181 ab | 0.109 ± 0.062 b |
| Rouge         | 0.408 ± 0.076 a | 0.275 ± 0.042 b  | 0.134 ± 0.071 c |
| Montana 5     | 0.385 ± 0.044 a | 0.163 ± 0.126 b  | 0.092 ± 0.067 b |
| Don Leon      | 0.386 ± 0.075 a | 0.151 ± 0.136 b  | 0.078 ± 0.030 b |
| K91           | 0.453 ± 0.241 a | 0.181 ± 0.116 ab | 0.085 ± 0.029 b |
| Alegria Disc. | 0.447 ± 0.037 a | 0.189 ± 0.059 b  | 0.081 ± 0.032 c |
| Don Armando   | 0.314 ± 0.103 a | 0.217 ± 0.108 ab | 0.067 ± 0.011 b |
| Red Amaranth  | 0.479 ± 0.239 a | 0.253 ± 0.113 ab | 0.155 ± 0.066 b |

**Table S7.** Anova results of biochemical data.

| variable                     | term      | df | sumsq   | meansq | statistic | p.value | signif |
|------------------------------|-----------|----|---------|--------|-----------|---------|--------|
| Ascorbate - ratio<br>Oxy/Tot | var       | 7  | 0,0     | 0,0    | 1,0294    | 0,4243  | ns     |
|                              | trt       | 2  | 0,0     | 0,0    | 0,6090    | 0,5483  | ns     |
|                              | var:trt   | 14 | 0,0     | 0,0    | 0,6676    | 0,7924  | ns     |
|                              | Residuals | 45 | 0,1     | 0,0    |           |         |        |
| Betacyanins                  | var       | 7  | 0,2     | 0,0    | 2,0139    | 0,0820  | ns     |
|                              | trt       | 2  | 0,0     | 0,0    | 1,2468    | 0,3002  | ns     |
|                              | var:trt   | 14 | 0,2     | 0,0    | 0,7537    | 0,7078  | ns     |
|                              | Residuals | 34 | 0,5     | 0,0    |           |         |        |
| Betaxanthins                 | var       | 7  | 0,1     | 0,0    | 1,4543    | 0,2167  | ns     |
|                              | trt       | 2  | 0,3     | 0,2    | 25,2233   | < 0,001 | ***    |
|                              | var:trt   | 14 | 0,0     | 0,0    | 0,2654    | 0,9947  | ns     |
|                              | Residuals | 34 | 0,2     | 0,0    |           |         |        |
| Chl a                        | var       | 7  | 2,4     | 0,3    | 2,1088    | 0,0605  | ns     |
|                              | trt       | 2  | 18,1    | 9,1    | 56,1033   | < 0,001 | ***    |
|                              | var:trt   | 14 | 1,0     | 0,1    | 0,4536    | 0,9462  | ns     |
|                              | Residuals | 48 | 7,8     | 0,2    |           |         |        |
| Chl b                        | var       | 7  | 0,1     | 0,0    | 1,0594    | 0,4038  | ns     |
|                              | trt       | 2  | 1,2     | 0,6    | 42,2679   | < 0,001 | ***    |
|                              | var:trt   | 14 | 0,1     | 0,0    | 0,4527    | 0,9467  | ns     |
|                              | Residuals | 48 | 0,7     | 0,0    |           |         |        |
| chl_ratio                    | var       | 7  | 7,5     | 1,1    | 0,8454    | 0,5559  | ns     |
|                              | trt       | 2  | 0,7     | 0,4    | 0,2853    | 0,7531  | ns     |
|                              | var:trt   | 14 | 13,5    | 1,0    | 0,7598    | 0,7046  | ns     |
|                              | Residuals | 47 | 59,9    | 1,3    |           |         |        |
| MDA                          | var       | 7  | 619,9   | 88,6   | 0,6467    | 0,7152  | ns     |
|                              | trt       | 2  | 640,6   | 320,3  | 2,3387    | 0,1073  | ns     |
|                              | var:trt   | 14 | 1842,7  | 131,6  | 0,9611    | 0,5049  | ns     |
|                              | Residuals | 48 | 6573,6  | 137,0  |           |         |        |
| Total flavonoids             | var       | 7  | 6155,8  | 879,4  | 0,7911    | 0,5982  | ns     |
|                              | trt       | 2  | 9664,1  | 4832,1 | 4,3467    | 0,0183  | *      |
|                              | var:trt   | 14 | 11978,3 | 855,6  | 0,7697    | 0,6952  | ns     |
|                              | Residuals | 49 | 54471,2 | 1111,7 |           |         |        |
| Total phenolics              | var       | 7  | 1,5     | 0,2    | 1,7831    | 0,1120  | ns     |
|                              | trt       | 2  | 3,9     | 2,0    | 16,7340   | < 0,001 | ***    |
|                              | var:trt   | 14 | 0,8     | 0,1    | 0,4873    | 0,9291  | ns     |
|                              | Residuals | 49 | 5,7     | 0,1    |           |         |        |
